# Supplementary material for: How does the Zn-precursor nature impact carrier transfer in ZnO/Zn-TiO2 nanostructures? organic vs. inorganic anions
Source: Royal Society of Chemistry journal article supplement (doi:10.1039/c9nj04097h), 2019-01-01
Supplement: c9nj04097h1.pdf [file c9nj04097h1.pdf]

## New Journal of Chemistry

### Supplementary information

#### How does the Zn-precursor nature impact on carrier transfer into ZnO/Zn-TiO<sub>2</sub> nanostructures? organic vs. inorganic anions

Joelma R. de Melo,<sup>\*a</sup> Andrés F. Gualdrón-Reyes,<sup>\*b,c</sup> Nádia R. Camargo Fernandes,<sup>a</sup> Marcelino L. Gimenes,<sup>a</sup> María I. Carreño-Lizcano,<sup>b,c</sup> Ingrid N. Sequeda-Pico,<sup>b,c</sup> Jhonatan Rodríguez-Pereira,<sup>b,d</sup> Víctor Baldovino-Medrano,<sup>b,d</sup> and Martha E. Niño Gómez<sup>\*b,c</sup>

<sup>a</sup>Universidade Estadual de Maringá, Departamento de Engenharia Química. Avenida Colombo 5790, Maringá 87020-260, Paraná, Brazil.

<sup>b</sup>Centro de Investigaciones en Catálisis (CICAT), Universidad Industrial de Santander, Sede UIS Guatiguará, Piedecuesta, Santander, Colombia. C.P. 681011.

<sup>c</sup>Centro de Investigación Científica y Tecnológica en Materiales y Nanociencias (CMN), Universidad Industrial de Santander, Piedecuesta, Santander, Colombia. C.P. 681011.

<sup>d</sup>Laboratorio en Ciencia de superficies (Surf-Lab), Universidad Industrial de Santander, km 2 vía El Refugio, C.P. 681011, Piedecuesta, Santander, Colombia.

*\*Corresponding Author:*

Email address: [marthan@uis.edu.co](mailto:marthan@uis.edu.co) (M.E. Niño-Gómez),

[andresgualdron105@gmail.com](mailto:andresgualdron105@gmail.com) (A. F. Gualdrón-Reyes)

[rmjoelma@gmail.com](mailto:rmjoelma@gmail.com) (J. Ribeiro de Melo)

## 1. Identification of main vibration modes in layer basic zinc salts

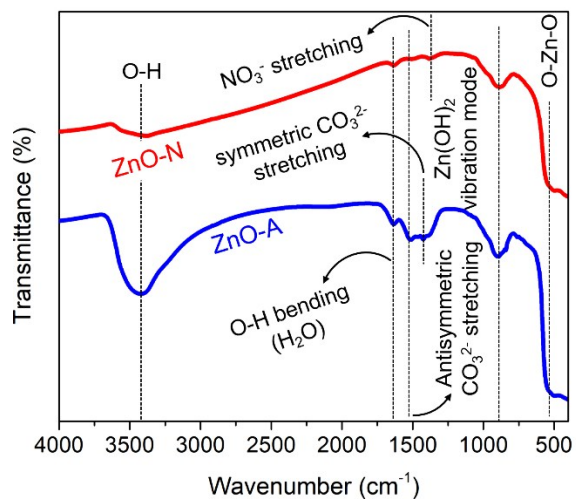

Figure S1. FT-IR spectra of ZnO-N and ZnO-A nanorods based powders.

## 2. morphology of a $\text{TiO}_2$ thin film

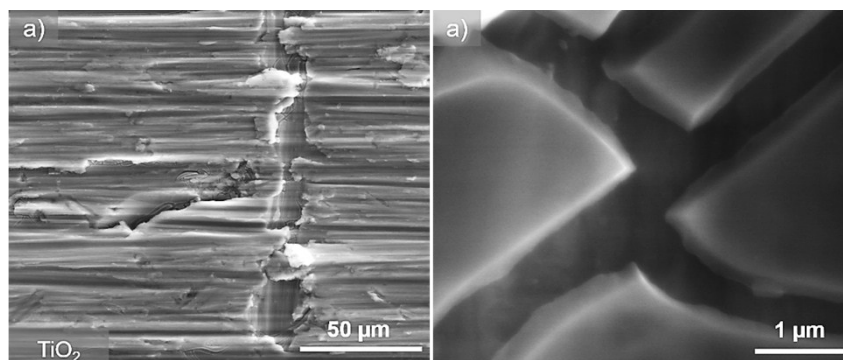

Figure S2. FESEM images of  $\text{TiO}_2$  film surface at (a) low and (b) high magnifications.

### 3. Photochemical properties of TiO<sub>2</sub>, N-ZT and A-ZT composite films

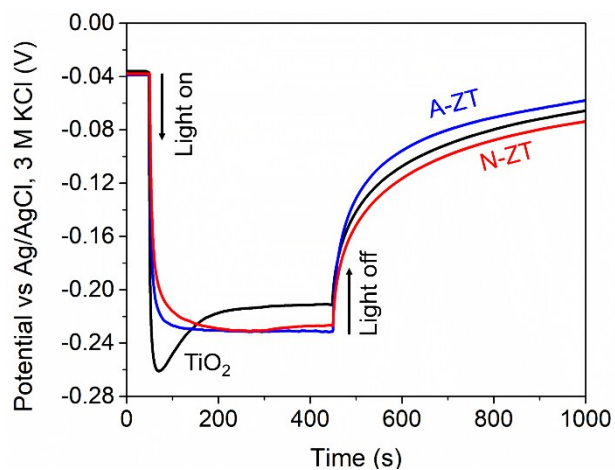

**Figure S3.** Open-circuit photopotential curves for TiO<sub>2</sub> film, N-ZT and A-ZT heterostructure based films.

### 4. Stabilized photocurrent of ZnO nanorods

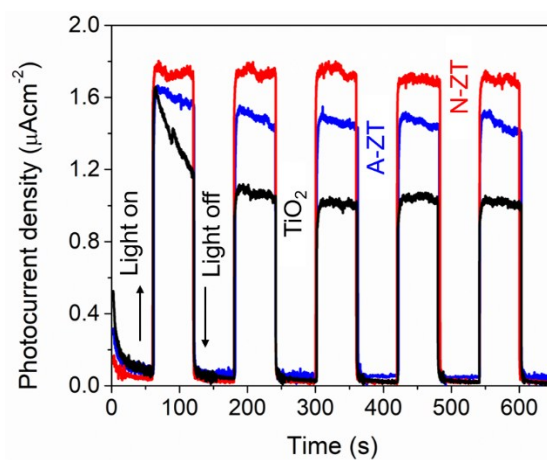

**Figure S4.** Chopped light transient photocurrent measurements for TiO<sub>2</sub> film, N-ZT and A-ZT heterostructure based films at 0.5 V vs. Ag/AgCl. Electrolyte solution: 0.1 M HClO<sub>4</sub> (pH 1); illumination source: halide lamp (60 mW cm<sup>-2</sup>).

## 5. XPS quantification of ZnO nanorods powders, N-ZT and A-ZT composite films

**Table S1.** Percentage of species identified during XPS analysis of ZnO nanorods-based powders.

| Sample | Chemical environment (at. %) |                |       |                 |
|--------|------------------------------|----------------|-------|-----------------|
|        | Oxygen species               | Carbon species | Zn-O  | Zn <sup>+</sup> |
| ZnO-N  | 34.75                        | 16.55          | 33.02 | 15.68           |
| ZnO-A  | 33.41                        | 26.75          | 26.37 | 13.47           |

**Table S2.** Percentage of species identified during XPS analysis of composite films.

| Sample | Chemical environment (at. %) |                |      |         |                  |                  |
|--------|------------------------------|----------------|------|---------|------------------|------------------|
|        | Oxygen species               | Carbon species | Zn-O | Zn-O-Ti | Ti <sup>3+</sup> | Ti <sup>4+</sup> |
| N-ZT   | 40.87                        | 43.85          | 0.40 | 0.91    | 1.11             | 12.86            |
| A-ZT   | 28.15                        | 63.01          | 0.85 | 0.79    | 0.25             | 6.95             |
